# Supplementary material for: Mental health: patients and service in crisis
Source: HighWire-hosted journal article supplement (doi:10.1136/bmj.j1141), 2017-03-13
Supplement: bmj.j1141.pdf [file bmj.j1141.pdf]

## 精神卫生：患者与危机的管理

### Mental health: patients and service in crisis

来源:BMJ 2017;356:j1141 doi: 10.1136/bmj.j1141

Jacqui wise 探究为何依据精神卫生法而被拘留的患者人数增多以及他们被如何对待。

警察破门而入 Emma McAllister (化名)的家,随后 Emma 在邻居面前被铐上手铐,带上了警车,并被安置在牢房里。她从来没有对任何人造成过威胁或实施暴力,但她确实患有精神障碍。

“当你精神状况不好还被拘留在警察局的牢房里时,让人十分害怕和无助,我觉得自己像是一个罪犯一样被对待,而且这会加重你的偏执观念。”Emma 对 *The BMJ* 说道。

Emma, 一位有着稳定工作的技术人

员,患有精神障碍 30 年,她患有进食障碍、抑郁症以及精神病性发作。她描述的事件发生在地向自己的全科医生求助之后。然而,根据 Emma 所说,她的全科医生无法联系到任何一位危机管理小组的成员,而又很担心 Emma 的安全,觉得除了叫警察别无选择。

“但我病情稳定时我更加害怕,害怕会再一次变得不好。”Emma 说到,“我害怕向任何人求助,因为我怕警察会再一次到我家并把我抓到牢房去。”

Emma 的经历并非独一无二。在英格兰,依据精神卫生法第 136 条的规定,允许警察将某个他们认为有精神障碍并需要“立即照护或者控制”的人从公共场合带离至安全的地方,这样的情况去年增长了 18%,达到 22 965 例。英国国家健康体系(NHS)的数据显示,在过去 10 年中,根据第 136 条法规运用职权拘留患者的数量增加了 4 倍以上<sup>1</sup>。

#### 最后一招

Emma 被带去警察局牢房,是因为一些地区没有足够多的、有医疗基础的“安全场所”,提供给那些符合精神卫生法规定需要等待评估的人。好消息是,近年来被关到牢房的人数已经大大减少。这部分缘于危机照护协议的形成,当地 NHS、警察和其他机构与服务团体约定共同合作改善危机

Jacqui Wise  
freelance journalist,

London, UK

黄 昀 译  
马 宁 校  
北京大学  
精神卫生研究所

#### “精神卫生法”下的拘留

第 2 条——如果出于对患者健康或安全、或其他人安全的考虑,认为是有必要的,则有权扣留认为有精神障碍的人进行评估和可能的治疗。法条可持续 28 天,不能延长或重新开始。

第 3 条——赋予拘留某人进行精神障碍治疗的权力。针对危及自身安全或者他人安全而需要被拘留的患者,同时只有住院才能得到治疗。该法条可持续 6 个月,可以重新开始。

第 4 条——紧急情况下,可以使用职权拘留某人进行评估,最长可拘留 72 小时。

第 136 条——赋予警方权力羁押需要立即照顾或控制的人,并将其带到安全的地方。拘留最长可持续 72 小时。

社区治疗令——允许被拘留在医院接受治疗的人离开医院,并在社区获得治疗。

管理服务([www.crisiscareconcordat.org.uk](http://www.crisiscareconcordat.org.uk))。

来自国家警察局长委员会的数据显示,英格兰及威尔士的警察局牢房被用来作为“安全场所”拘留精神障碍患者的次数从2014—2015年间的4 537次下降到2015—2016年间的2 100次,减少了56%<sup>2</sup>。然而,这存在着明显的地域差异,有些地方报告几乎没有人被关到牢房中,而也有地方报告了很高的数字。

2016年8月,英国卫生部门宣布将投入1 500万英镑(约合1 700万欧元,1 800万美元)来改善和扩建精神卫生安全场所,减少警察局牢房的使用。这些经费将被用在那些有牢房拘留精神障碍患者最糟糕记录的地区<sup>3</sup>。

另外一个好消息是,“2017年治安与犯罪法”于1月31日被皇室批准<sup>4</sup>。这将停止把正在经历精神危机状况的儿童和青少年关到警察局牢房里,并限制成年患者被带到警察局的情形。

内政部长 Amber Rudd 说:“警察从来不应该是处理精神状况处于危机状态个体的默认责任者。”

警察督察 Michael Brown 写了一篇名为精神卫生警察(<https://mentalhealthcop.wordpress.com/>)的博客,他告诉 *The BMJ*:“警察的职责一直被扩大化,为紧急精神卫生服务”。

Brown 说,警察几乎没有接受过正式的管理精神疾病患者的培训。“一个高度焦虑的人可能是因为没有正确服用抗抑郁药物而出现了5羟色胺综合征,这些症状并不明显,大多数警察都无法区分。我们需要对警方在这一领域的角色进行适当的讨论。”

Brown 说,被拘留在警察局牢房的人数减少可能意味着这个问题已经被转移到医院急诊部门了。他补充说,大多数情况下,有医疗基础的安全场所仅仅是一个房间,并无法很快见到精神卫生医疗人员并获得服务。“警察可能不得和患者待在一起6~7个小时,等待医务人员到来。”

但伦敦儿童和青少年精神科顾问以及英国医学会(BMA)社区医疗委员会主席 Gary Wannan 说:“即使有医疗基础的安全场所并不完美,但至少患者不用经历被逮捕投入牢房的创伤。他们应该更快地得到所需要的精神卫生评估。”

### 人权问题

适用于1983精神卫生法的总人数持续升高。

在英格兰,2015—2016年度,共有63 622人因此被强制入院,比上一年增长了9%。自2006年以来,适用于精神卫生法的总人数已经上升了47%<sup>1</sup>。

在苏格兰,精神卫生委员会2016年曾警告,对精神病患者采取强制性治疗的增加是一个“人权问题”。委员会说,2016年,强制拘留和治疗的指令共下达了5 008次——是自2003精神卫生法被引入苏格兰以来的历史最高记录<sup>5</sup>。

医疗照护质量委员会正在对为什么依据精神卫生法而被拘留的人数持续增长进行调查,预计今年下半年公布。医院的执行检查员(领导精神科) Paul Lelliott 说,“例如,我们不知道这种增加多大程度上是由反复拘留所导致。这可能意味着社区对严重精神障碍患者缺乏支持,或者如果人们被反复拘留,可能说明有些服务机构在实行“旋转门”的收住方式”。

### 社区治疗

近些年来的一个重要改变是,越来越多符合精神卫生法规定的患者依据社区治疗令(或苏格兰强制性治疗令)在社区接受治疗,而不是医院。英格兰的最新数据显示,采用社区治疗令,患者人数稍有下降,下降了4%,从4 564人减少到4 361人,这是社区治疗令实施4年以来的首次下降。但在苏格兰,采用新实施强制治疗令,人数比上一年增长了8%,共1 386人。

2008年社区治疗令被引入,当时受到精神卫生慈善机构的反对。该法令意在解决“旋转门综合征”,即精神病患者被反复的非自愿入院、出院。但一项 *Lancet* 发表的随机对照研究显示,社区治疗令并没有减少再入院率<sup>6-7</sup>。

精神卫生慈善机构 MIND 的首席执行官 Paul Farmer 说,“社区治疗令的使用远远超过最初的预测,在某些情况下甚至被不恰当的使用。研究表明,这并不比先前的方法更为有效,而且它们的限制性更强,持续更久”。

### 早期支持

去年,由皇家精神科医师学院创立的 Nigel Crisp 领导的独立委员会警告说,对严重精神障碍成年患者的急症治疗“在全国范围内是不足的,在某些情况下可能会有危险。”委员会建议,进入医院急性精神科病房的等待时间最多4小时,或者应居

家治疗<sup>8,9</sup>。

Wanna说,“精神卫生是灰姑娘服务,尽管政府承诺增加经费,而证据证明是在减少。如果我们能得到适宜的易于获得的帮助,那我们就有可能防止患者被拘留。”

他补充说,“我听说有些家庭因无法及时得到需要的帮助,而被迫打电话找警察。”

Farmer说,“我们担心:患者被拘留增加可能是因为没有及时得到帮助,这意味着他们更有可能达到危机的状况,可能需要根据精神卫生法而被拘留。我们也听说了一些轶闻报道,延伸过界的服务和床位的短缺意味着,在一些情况下,专业人员不得不迫于压力依据法律的规定来处置患者,以保证他们得到所需要的照护。这是不能被接受的。”

皇家全科医生学院的精神科临床主任Liz说,“主要的问题是由于危机管理小组没有足够的资源,患者明显过早的从危机管理小组服务中出组了,他们的病情迅速恶化并需要再次住院。”

她补充说,“我认为危机管理小组非常擅长处理严重精神障碍患者,例如精神分裂症或者精神病性障碍,并且有一个明确的服务路径。但是,有一大群行为障碍或人格障碍的人,他们不知道该如何处理,这些人在精神卫生系统内被踢来踢去。”

Emma明白为何精神障碍患者被拘留的情况增加。“即使是在5年前,也有更多的常规精神卫生服务。”她说。“我以前得到过一位社区精神科护士和一位精神科医生的支持,他们很了解我,当我情况变得不好时能及时被发现。现在,由于减少了团队同时还增加了他们的工作量,这样的帮助已经没有了。”

Emma补充说,“能帮助到的是能直接简单的获取危机管理帮助,这样当我情况真的很不好

时,我可以自我转介。而现在唯一获得危机管理服务的方法就是去急诊室,或者是被警察带走。”

Emma McAllister is a pseudonym.

利益竞争 (Competing interests): I have read and understood BMJ policy on declaration of interests and have no relevant interests to declare.

来源及同行评议 (Provenance and peer review): Commissioned; externally peer reviewed.

#### 参考文献

- 1 NHS Digital. Inpatients formally detained in hospitals under the Mental Health Act 1983 and patients subject to supervised community treatment: 2015/16. 2016. <http://www.content.digital.nhs.uk/catalogue/PUB22571>.
- 2 UK Police. Use of police cells for those in mental health crisis more than halves. 2016. <http://news.npcc.police.uk/releases/use-of-police-cells-for-those-in-mental-health-crisis-more-than-halves>.
- 3 Government announces successful bids to £15 million mental health fund, 23 Aug 2016. <https://www.gov.uk/government/news/government-announces-successful-bids-to-15-million-mental-health-fund>.
- 4 Home Office. Policing and Crime Act. 2017. <https://www.gov.uk/government/collections/policing-and-crime-bill>.
- 5 Mental Welfare Commission of Scotland. Mental Health Act monitoring. 2015-16. [http://www.mwscot.org.uk/media/342871/mha\\_monitoring\\_report\\_to\\_omg\\_on\\_2\\_aug\\_2016\\_-\\_final\\_ab\\_19\\_sept\\_16\\_jw\\_26.09.pdf](http://www.mwscot.org.uk/media/342871/mha_monitoring_report_to_omg_on_2_aug_2016_-_final_ab_19_sept_16_jw_26.09.pdf).
- 6 Dyer C. Community treatment orders have not reduced admissions, study shows. *BMJ* 2013;346:f1993. doi:10.1136/bmj.f1993 pmid:23530016.
- 7 Burns T, Rugkåsa J, Molodynski A, et al. Community treatment orders for patients with psychosis (OCTET): a randomised controlled trial. *Lancet* 2013;381:1627-33. doi:10.1016/S0140-6736(13)60107-5 pmid:23537605.
- 8 Commission to Review the Provision of Acute Inpatient Psychiatric Care for Adults. Old problems, new solutions: improving acute psychiatric care for adults in England. 2016. [media.wix.com/ugd/0e662e\\_15ee6729e0e946c8bf19397791ea2ac2.pdf](http://media.wix.com/ugd/0e662e_15ee6729e0e946c8bf19397791ea2ac2.pdf).
- 9 Gulland A. Four hour waiting time for acute psychiatric care urged. *BMJ* 2016;352:i773. doi:10.1136/bmj.i773 pmid:26860332.

## 消息 Filler

### 欢迎您将已在英国医学杂志(*The BMJ*)和*BMJ Open*发表的文章刊登于英国医学杂志中文版

英国医学杂志(*The BMJ*)中文版是中华医学会与英国医学学会版权合作的翻译性综合类学术期刊,创刊于1998年,是中华医学会系列期刊之一。

欢迎您将已在*The BMJ*、*BMJ Open*上发表的文章以中文形式刊登在英国医学杂志中文版,此种情况已经*BMJ*出版集团授权认可,不属于一稿两登。联系方式:电话010-85158171,电子邮箱:cmabmj@cma.org.cn。

英国医学杂志中文版编辑部

BMJ takes no responsibility for the accuracy of the translation from the published English language original and is not liable for any errors that may occur.

# BMJ
